# Supplementary material for: The Massive Online Needs Assessment (MONA) to inform the development of an emergency haematology educational blog series
Source: PubMed Central journal article supplement (PMC6002288; doi:10.1007/s40037-018-0406-0), 2018-02-27
Supplement: 40037_2018_406_MOESM3_ESM.pdf [file 40037_2018_406_MOESM3_ESM.pdf]

**Appendix C. Topics in area of perceived needs within the domains of thrombosis and clotting, acute bleeding, and treatment and therapy of thrombosis and bleeding.**

| Topic                                                                                                 | Number of Survey Respondents (%) |
|-------------------------------------------------------------------------------------------------------|----------------------------------|
| <b>Thrombosis and clotting</b>                                                                        |                                  |
| Risk of thrombosis for reversal agents                                                                | 142 (71.7)                       |
| Interruption of anticoagulation for procedures                                                        | 133 (67.2)                       |
| Anticoagulation in pregnancy                                                                          | 113 (57.1)                       |
| Anticoagulation with renal impairment                                                                 | 111 (56.1)                       |
| Decisions on duration of anticoagulation for venous thrombosis                                        | 110 (55.6)                       |
| Anticoagulation in cancer patients                                                                    | 76 (38.4)                        |
| Diagnosis of venous thrombosis                                                                        | 66 (33.3)                        |
| <b>Acute bleeding</b>                                                                                 |                                  |
| Adjunct treatments for acute bleeding                                                                 | 132 (66.7)                       |
| Managing acute venous thrombosis in the bleeding patient                                              | 125 (63.1)                       |
| Monitoring new anticoagulants                                                                         | 124 (62.6)                       |
| Massive transfusion protocols                                                                         | 117 (59.1)                       |
| Interpretation of DIC workup, iron deficiency blood work, and erythropoietin levels                   | 113 (57.1)                       |
| Management of the acutely bleeding pregnant woman/woman of childbearing age                           | 109 (55.1)                       |
| Risk scores for bleeding                                                                              | 95 (48.0)                        |
| Acute management of inherited bleeding disorders (including hemophilia)                               | 95 (48.0)                        |
| <b>Treatment and therapy of thrombosis and bleeding</b>                                               |                                  |
| Reversal of anticoagulants                                                                            | 153 (77.3)                       |
| Treatment of coagulopathies                                                                           | 127 (64.1)                       |
| Appropriateness of transfusion (indications for transfusion, choice of blood products, hemovigilance) | 105 (53.0)                       |
| Adverse Effects of Transfusion including best practices for diagnosis and reporting                   | 92 (46.5)                        |
| Peri-procedural triggers for Transfusion                                                              | 67 (33.8)                        |
| Choice of anticoagulants for venous thrombosis                                                        | 129 (65.2)                       |
| Choice of anticoagulants for stroke prevention in atrial fibrillation                                 | 104 (52.5)                       |
