# Supplementary material for: The Massive Online Needs Assessment (MONA) to inform the development of an emergency haematology educational blog series
Source: PubMed Central journal article supplement (PMC6002288; doi:10.1007/s40037-018-0406-0), 2018-02-27
Supplement: 40037_2018_406_MOESM4_ESM.pdf [file 40037_2018_406_MOESM4_ESM.pdf]

**Appendix D Topics in areas of perceived needs from the difficult scenario descriptions.**

| Rank                                                                           | Topic                                                                                                                                                                                                                                                                                                                                                                                                                                                                                                                                                                                                                                                                                                | Frequency              | % of Cases | New Topic*                                                       |    |                                                                         |    |                                                                                |   |                                                           |   |                                  |   |    |       |     |
|--------------------------------------------------------------------------------|------------------------------------------------------------------------------------------------------------------------------------------------------------------------------------------------------------------------------------------------------------------------------------------------------------------------------------------------------------------------------------------------------------------------------------------------------------------------------------------------------------------------------------------------------------------------------------------------------------------------------------------------------------------------------------------------------|------------------------|------------|------------------------------------------------------------------|----|-------------------------------------------------------------------------|----|--------------------------------------------------------------------------------|---|-----------------------------------------------------------|---|----------------------------------|---|----|-------|-----|
| 1                                                                              | Weighing risks and benefits of bleeding & clotting <table border="1" data-bbox="256 298 1015 531"> <thead> <tr> <th>Sub-themes for Topic 1</th> <th>Frequency</th> </tr> </thead> <tbody> <tr> <td>GI bleed with need for anticoagulation</td> <td>17</td> </tr> <tr> <td>ICH with need for anticoagulation</td> <td>12</td> </tr> <tr> <td>ACS with concurrent bleeding</td> <td>6</td> </tr> <tr> <td>Epistaxis in difficult situations (e.g. mechanical valve)</td> <td>2</td> </tr> <tr> <td>Other (e.g. Trauma)</td> <td>5</td> </tr> </tbody> </table>                                                                                                                                         | Sub-themes for Topic 1 | Frequency  | GI bleed with need for anticoagulation                           | 17 | ICH with need for anticoagulation                                       | 12 | ACS with concurrent bleeding                                                   | 6 | Epistaxis in difficult situations (e.g. mechanical valve) | 2 | Other (e.g. Trauma)              | 5 | 42 | 35.9% | Yes |
| Sub-themes for Topic 1                                                         | Frequency                                                                                                                                                                                                                                                                                                                                                                                                                                                                                                                                                                                                                                                                                            |                        |            |                                                                  |    |                                                                         |    |                                                                                |   |                                                           |   |                                  |   |    |       |     |
| GI bleed with need for anticoagulation                                         | 17                                                                                                                                                                                                                                                                                                                                                                                                                                                                                                                                                                                                                                                                                                   |                        |            |                                                                  |    |                                                                         |    |                                                                                |   |                                                           |   |                                  |   |    |       |     |
| ICH with need for anticoagulation                                              | 12                                                                                                                                                                                                                                                                                                                                                                                                                                                                                                                                                                                                                                                                                                   |                        |            |                                                                  |    |                                                                         |    |                                                                                |   |                                                           |   |                                  |   |    |       |     |
| ACS with concurrent bleeding                                                   | 6                                                                                                                                                                                                                                                                                                                                                                                                                                                                                                                                                                                                                                                                                                    |                        |            |                                                                  |    |                                                                         |    |                                                                                |   |                                                           |   |                                  |   |    |       |     |
| Epistaxis in difficult situations (e.g. mechanical valve)                      | 2                                                                                                                                                                                                                                                                                                                                                                                                                                                                                                                                                                                                                                                                                                    |                        |            |                                                                  |    |                                                                         |    |                                                                                |   |                                                           |   |                                  |   |    |       |     |
| Other (e.g. Trauma)                                                            | 5                                                                                                                                                                                                                                                                                                                                                                                                                                                                                                                                                                                                                                                                                                    |                        |            |                                                                  |    |                                                                         |    |                                                                                |   |                                                           |   |                                  |   |    |       |     |
| 2                                                                              | VTE Management - Assessing need for anticoagulation (Starting new or restarting, or when to stop) <table border="1" data-bbox="256 634 1015 913"> <thead> <tr> <th>Sub-themes for Topic 2</th> <th>Frequency</th> </tr> </thead> <tbody> <tr> <td>Restarting (e.g. anticoagulation held recently, when to restart)</td> <td>3</td> </tr> <tr> <td>Stopping (e.g. needs anticoagulation for prevention, but has new bleed)</td> <td>3</td> </tr> <tr> <td>Starting new (e.g. Afib, Subsegmental PE, Upper limb, DVT, Cancer-related DVT)</td> <td>3</td> </tr> <tr> <td>Anticoagulant Failure</td> <td>1</td> </tr> <tr> <td>Cerebral Venous Sinus Thrombosis</td> <td>1</td> </tr> </tbody> </table> | Sub-themes for Topic 2 | Frequency  | Restarting (e.g. anticoagulation held recently, when to restart) | 3  | Stopping (e.g. needs anticoagulation for prevention, but has new bleed) | 3  | Starting new (e.g. Afib, Subsegmental PE, Upper limb, DVT, Cancer-related DVT) | 3 | Anticoagulant Failure                                     | 1 | Cerebral Venous Sinus Thrombosis | 1 | 11 | 9.4%  | No  |
| Sub-themes for Topic 2                                                         | Frequency                                                                                                                                                                                                                                                                                                                                                                                                                                                                                                                                                                                                                                                                                            |                        |            |                                                                  |    |                                                                         |    |                                                                                |   |                                                           |   |                                  |   |    |       |     |
| Restarting (e.g. anticoagulation held recently, when to restart)               | 3                                                                                                                                                                                                                                                                                                                                                                                                                                                                                                                                                                                                                                                                                                    |                        |            |                                                                  |    |                                                                         |    |                                                                                |   |                                                           |   |                                  |   |    |       |     |
| Stopping (e.g. needs anticoagulation for prevention, but has new bleed)        | 3                                                                                                                                                                                                                                                                                                                                                                                                                                                                                                                                                                                                                                                                                                    |                        |            |                                                                  |    |                                                                         |    |                                                                                |   |                                                           |   |                                  |   |    |       |     |
| Starting new (e.g. Afib, Subsegmental PE, Upper limb, DVT, Cancer-related DVT) | 3                                                                                                                                                                                                                                                                                                                                                                                                                                                                                                                                                                                                                                                                                                    |                        |            |                                                                  |    |                                                                         |    |                                                                                |   |                                                           |   |                                  |   |    |       |     |
| Anticoagulant Failure                                                          | 1                                                                                                                                                                                                                                                                                                                                                                                                                                                                                                                                                                                                                                                                                                    |                        |            |                                                                  |    |                                                                         |    |                                                                                |   |                                                           |   |                                  |   |    |       |     |
| Cerebral Venous Sinus Thrombosis                                               | 1                                                                                                                                                                                                                                                                                                                                                                                                                                                                                                                                                                                                                                                                                                    |                        |            |                                                                  |    |                                                                         |    |                                                                                |   |                                                           |   |                                  |   |    |       |     |
| 3                                                                              | Reversal agents (including decision to reverse; how to handle antiplatelet agents)                                                                                                                                                                                                                                                                                                                                                                                                                                                                                                                                                                                                                   | 8                      | 6.8%       | No                                                               |    |                                                                         |    |                                                                                |   |                                                           |   |                                  |   |    |       |     |
| 4                                                                              | Coagulopathy of Liver Failure                                                                                                                                                                                                                                                                                                                                                                                                                                                                                                                                                                                                                                                                        | 7                      | 6.0%       | Yes                                                              |    |                                                                         |    |                                                                                |   |                                                           |   |                                  |   |    |       |     |
| 5                                                                              | Periprocedural Anticoagulation / Coagulation Mgt (LP, Abdominal Surgery, Spinal anesthesia, Hemarthrosis)                                                                                                                                                                                                                                                                                                                                                                                                                                                                                                                                                                                            | 6                      | 5.1%       | No                                                               |    |                                                                         |    |                                                                                |   |                                                           |   |                                  |   |    |       |     |
| 6                                                                              | Choosing/Identifying Anticoagulation (DOACs, Coumadin, LMWH, others) vs. Antiplatelet (e.g. Prasugrel)                                                                                                                                                                                                                                                                                                                                                                                                                                                                                                                                                                                               | 6                      | 5.1%       | No                                                               |    |                                                                         |    |                                                                                |   |                                                           |   |                                  |   |    |       |     |
| 7                                                                              | Maintaining perfusion in bleeding patient (e.g. Massive Transfusion for Resuscitation)                                                                                                                                                                                                                                                                                                                                                                                                                                                                                                                                                                                                               | 5                      | 4.3%       | Yes                                                              |    |                                                                         |    |                                                                                |   |                                                           |   |                                  |   |    |       |     |
| 8                                                                              | Inherited Bleeding Disorders (Hemophilia, Glanzmann thrombasthenia)                                                                                                                                                                                                                                                                                                                                                                                                                                                                                                                                                                                                                                  | 5                      | 4.3%       | Yes                                                              |    |                                                                         |    |                                                                                |   |                                                           |   |                                  |   |    |       |     |
| 9                                                                              | DIC                                                                                                                                                                                                                                                                                                                                                                                                                                                                                                                                                                                                                                                                                                  | 4                      | 3.4%       | Yes                                                              |    |                                                                         |    |                                                                                |   |                                                           |   |                                  |   |    |       |     |
| 10 (tie)                                                                       | Platelet transfusion & Hemostasis (e.g. ITP, bone marrow suppression, dialysis)                                                                                                                                                                                                                                                                                                                                                                                                                                                                                                                                                                                                                      | 3                      | 2.6%       | Yes                                                              |    |                                                                         |    |                                                                                |   |                                                           |   |                                  |   |    |       |     |
| 10 (tie)                                                                       | Gynecologic sources of bleeding                                                                                                                                                                                                                                                                                                                                                                                                                                                                                                                                                                                                                                                                      | 3                      | 2.6%       | Yes                                                              |    |                                                                         |    |                                                                                |   |                                                           |   |                                  |   |    |       |     |
| Other bleeding and thrombosis topics identified                                | Pregnancy & VTE                                                                                                                                                                                                                                                                                                                                                                                                                                                                                                                                                                                                                                                                                      | 2                      |            | No                                                               |    |                                                                         |    |                                                                                |   |                                                           |   |                                  |   |    |       |     |
|                                                                                | Bleeding NYD                                                                                                                                                                                                                                                                                                                                                                                                                                                                                                                                                                                                                                                                                         | 2                      |            | Yes                                                              |    |                                                                         |    |                                                                                |   |                                                           |   |                                  |   |    |       |     |
|                                                                                | HIT                                                                                                                                                                                                                                                                                                                                                                                                                                                                                                                                                                                                                                                                                                  | 2                      |            | Yes                                                              |    |                                                                         |    |                                                                                |   |                                                           |   |                                  |   |    |       |     |
|                                                                                | Alternatives to transfusion                                                                                                                                                                                                                                                                                                                                                                                                                                                                                                                                                                                                                                                                          | 1                      |            | Yes                                                              |    |                                                                         |    |                                                                                |   |                                                           |   |                                  |   |    |       |     |
|                                                                                | Bleeding in Cancer/BM suppressed pt                                                                                                                                                                                                                                                                                                                                                                                                                                                                                                                                                                                                                                                                  | 1                      |            |                                                                  |    |                                                                         |    |                                                                                |   |                                                           |   |                                  |   |    |       |     |
|                                                                                | DOACs & Thrombolysis in stroke                                                                                                                                                                                                                                                                                                                                                                                                                                                                                                                                                                                                                                                                       | 1                      |            | Yes                                                              |    |                                                                         |    |                                                                                |   |                                                           |   |                                  |   |    |       |     |
|                                                                                | When to suspect lab error                                                                                                                                                                                                                                                                                                                                                                                                                                                                                                                                                                                                                                                                            | 1                      |            | Yes                                                              |    |                                                                         |    |                                                                                |   |                                                           |   |                                  |   |    |       |     |
|                                                                                | Diagnosis of DVT                                                                                                                                                                                                                                                                                                                                                                                                                                                                                                                                                                                                                                                                                     | 1                      |            | No                                                               |    |                                                                         |    |                                                                                |   |                                                           |   |                                  |   |    |       |     |
|                                                                                | Cancer related DVT mgt                                                                                                                                                                                                                                                                                                                                                                                                                                                                                                                                                                                                                                                                               | 1                      |            | No                                                               |    |                                                                         |    |                                                                                |   |                                                           |   |                                  |   |    |       |     |
|                                                                                | Sickle cell pts & transfusion                                                                                                                                                                                                                                                                                                                                                                                                                                                                                                                                                                                                                                                                        | 1                      |            | Yes                                                              |    |                                                                         |    |                                                                                |   |                                                           |   |                                  |   |    |       |     |
|                                                                                | Coagulopathy of Trauma                                                                                                                                                                                                                                                                                                                                                                                                                                                                                                                                                                                                                                                                               | 1                      |            | Yes                                                              |    |                                                                         |    |                                                                                |   |                                                           |   |                                  |   |    |       |     |
|                                                                                | Cost of medications                                                                                                                                                                                                                                                                                                                                                                                                                                                                                                                                                                                                                                                                                  | 1                      |            | Yes                                                              |    |                                                                         |    |                                                                                |   |                                                           |   |                                  |   |    |       |     |

\* New topic identified that was not identified in any other phase of the needs assessment (e.g. survey free text, by investigators)
